# Supplementary material for: Determination of promethazine in forensic samples using multi-walled carbon nanotube-gold nanoparticle electrochemical sensor
Source: Royal Society of Chemistry journal article supplement (doi:10.1039/d3ay01706k), 2023-12-12
Supplement: d3ay01706k1.pdf [file d3ay01706k1.pdf]

## Electronic Supplementary Information

### Determination of promethazine in forensic samples using multi-walled carbon nanotubes-gold nanoparticles electrochemical sensor

Natthakarn Chanjamsri<sup>a</sup>, Apichai Phonchai<sup>b,c</sup>, Kamonwad Ngamchuea<sup>d</sup>

Duangjai Nacapricha<sup>e,f</sup>, Prapin Wilairat<sup>e,f</sup>, Korbua Chaisiwamongkhol<sup>a,b,g,\*</sup>

<sup>a</sup> School of Science, Mae Fah Luang University, Chiang Rai 57100, Thailand

<sup>b</sup> Division of Health and Applied Sciences, Faculty of Science, Prince of Songkla University, Hat Yai, Songkhla 90110, Thailand

<sup>c</sup> Forensic Science Innovation and Service Center, Prince of Songkla University, Hat Yai, Songkhla 90110, Thailand

<sup>d</sup> School of Chemistry, Institute of Science, Suranaree University of Technology, 111 University Avenue, Suranaree, Muang, Nakhon Ratchasima 30000, Thailand

<sup>e</sup> Department of Chemistry and Center of Excellence for Innovation in Chemistry, Faculty of Science, Mahidol University, Bangkok 10400, Thailand

<sup>f</sup> Flow Innovation-Research for Science and Technology Laboratories (FIRST Labs)

<sup>g</sup> Center of Chemical Innovation for Sustainability (CIS), Mae Fah Luang University, Chiang Rai 57100, Thailand

\*Corresponding author: Korbua Chaisiwamongkhol, School of Science, Mae Fah Luang University, Chiang Rai 57100, Thailand and Division of Health and Applied Sciences, Faculty of Science, Prince of Songkla University, Hat Yai, Songkhla 90110, Thailand

Email: korbua.kc@gmail.com

## S1 Characterization of gold nanoparticles (AuNPs)

Gold nanoparticles (AuNPs) were prepared via sodium citrate reduction method following the procedure developed by Pu *et al.*[1]. TEM was employed to confirm the size and morphology of the synthesized AuNPs. The AuNPs are spherical with average size of  $13.4 \pm 0.3$  nm (Fig S1(A) and S1(B)).

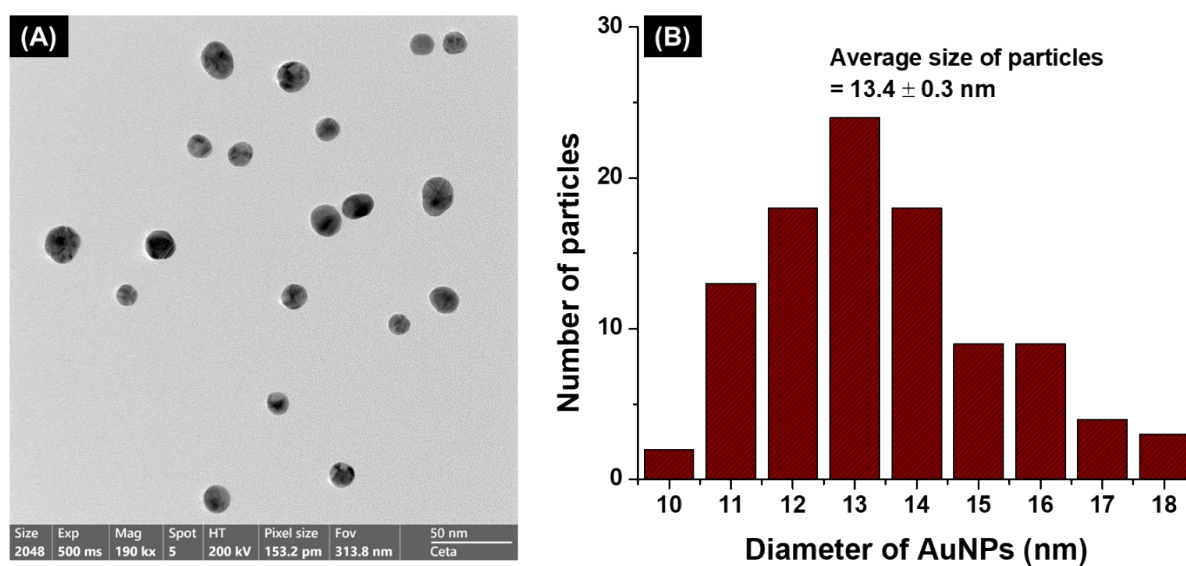

**Fig. S1** (A) The TEM image of AuNPs and (B) size distribution of the AuNPs ( $n=100$ ) obtained from the TEM images.

## S2 EDS spectrum of MWCNTs/AuNPs/GCE

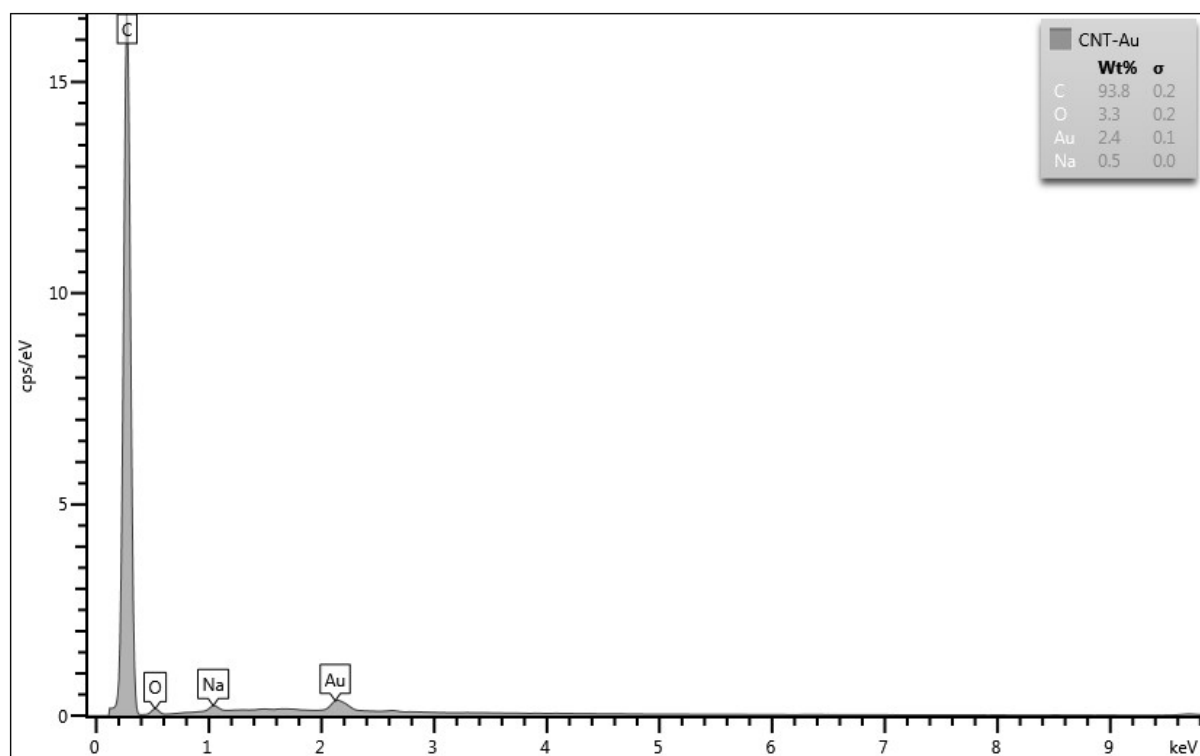

**Fig. S2** EDS spectrum of MWCNTs/AuNPs/GCE surface for C, O, and Au.

\*Note that the presence of Na in the spectrum may be come from the sodium citrate which was used as the capping agent in gold nanoparticles synthesis.

### S3 Effect of volume of modifiers (MWCNTs and AuNPs)

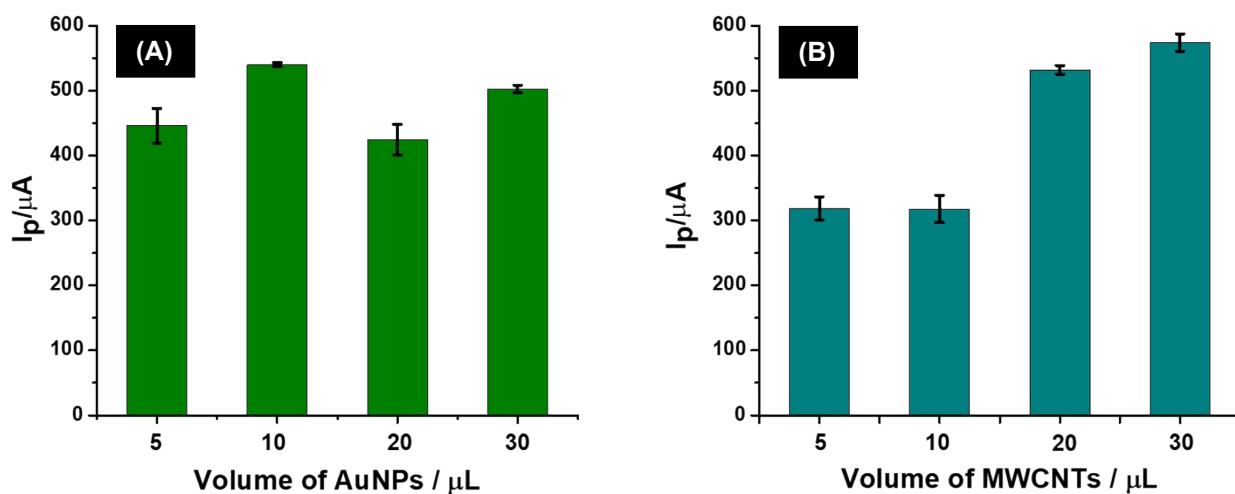

Fig. S3 Effect of (A) the volume of AuNPs on the GCE and (B) the volume of MWCNTs on the GCE.

### S4 Effect of deposition potential and deposition time

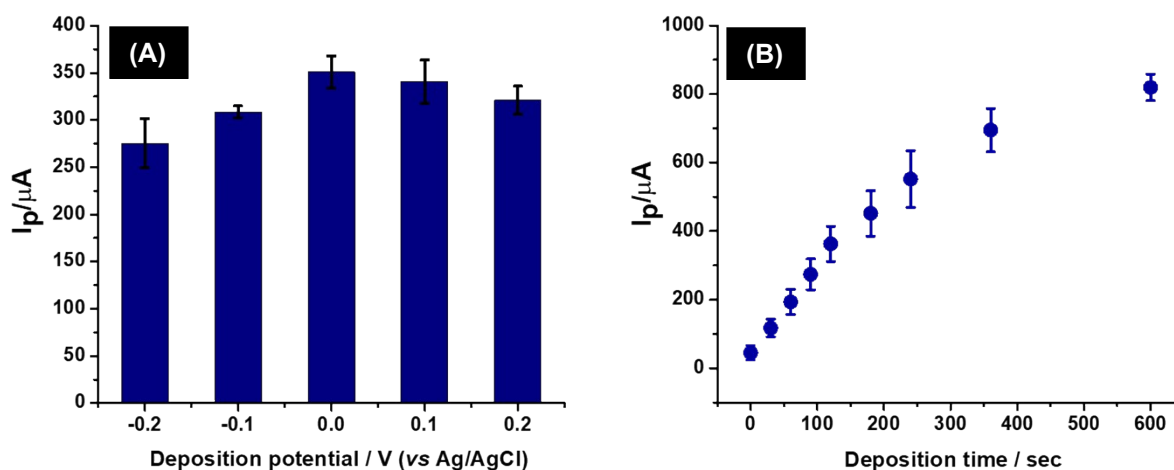

Fig. S4 Effect of (A) deposition potential (-0.2 to +0.2 V vs Ag/AgCl) and (B) deposition time (0 to 600 sec) on the peak current of promethazine using MWCNTs/AuNPs/GCE in  $0.30 \text{ mol L}^{-1}$  phosphate buffer (pH = 7.0).

**S4 Declared composition by the manufacturers for the samples and simulated samples.**

**Table S1** Chemical compositions declared by the manufacturers of the analyzed samples.

| Sample | Type                            | Physical form | Declared ingredients                                                                                                                                                                                                                                  |
|--------|---------------------------------|---------------|-------------------------------------------------------------------------------------------------------------------------------------------------------------------------------------------------------------------------------------------------------|
| PD-1   | <i>'Purple drank'</i>           | Syrup         | <ol style="list-style-type: none"> <li>1. Grape syrup</li> <li>2. Sugar</li> <li>3. Sucralose</li> <li>4. Citric acid</li> <li>5. Vitamin B6</li> <li>6. Vitamine B12</li> <li>7. L-Theanine</li> <li>8. Collagen</li> <li>9. Promethazine</li> </ol> |
| PD-2   | <i>'Purple drank'</i>           | Syrup         | <ol style="list-style-type: none"> <li>1. Grape syrup</li> <li>2. Sugar</li> <li>3. Sucralose</li> <li>4. Citric acid</li> <li>5. Vitamin B6</li> <li>6. Vitamine B12</li> <li>7. L-Theanine</li> <li>8. Collagen</li> <li>9. Promethazine</li> </ol> |
| SPD-1  | Simulated <i>'Purple drank'</i> | Liquid        | <ol style="list-style-type: none"> <li>1. Promethazine syrup</li> <li>2. Soft drink</li> <li>3. Lemon soda</li> </ol>                                                                                                                                 |
| SPD-2  | Simulated <i>'Purple drank'</i> | Liquid        | <ol style="list-style-type: none"> <li>1. Promethazine syrup</li> <li>2. Tramadol</li> <li>3. Lemon soda</li> </ol>                                                                                                                                   |
| PF-1   | Promethazine syrup              | Syrup         | <ol style="list-style-type: none"> <li>1. Promethazine hydrochloride</li> </ol>                                                                                                                                                                       |
| PF-2   | Promethazine syrup              | Syrup         | <ol style="list-style-type: none"> <li>1. Promethazine hydrochloride</li> </ol>                                                                                                                                                                       |

|      |                                               |        |                                                                                                                                                                                                                                                                                    |
|------|-----------------------------------------------|--------|------------------------------------------------------------------------------------------------------------------------------------------------------------------------------------------------------------------------------------------------------------------------------------|
| PF-3 | Promethazine tablet                           | Tablet | <ol style="list-style-type: none"> <li>1. Promethazine hydrochloride</li> <li>2. Lactose monohydrate</li> <li>3. Maize starch</li> <li>4. Povidone</li> <li>5. Magnesium stearate</li> <li>6. Hypromellose</li> <li>7. Macrogol 200</li> <li>8. Opaspray Blue M-1-4210A</li> </ol> |
| PF-4 | Promethazine tablet                           | Tablet | <ol style="list-style-type: none"> <li>1. Promethazine hydrochloride</li> <li>2. Lactose monohydrate</li> <li>3. Maize starch</li> <li>4. Povidone</li> <li>5. Magnesium stearate</li> <li>6. Hypromellose</li> <li>7. Macrogol 200</li> <li>8. Opaspray Blue M-1-4210A</li> </ol> |
| AS-1 | Artificial saliva for pharmaceutical research | Liquid | No components need to be disclosed according to the applicable regulations.                                                                                                                                                                                                        |
| AS-2 | Artificial saliva for pharmaceutical research | Liquid | No components need to be disclosed according to the applicable regulations.                                                                                                                                                                                                        |

## References

1. W. Pu, H. Zhao, L. Wu, and X. Zhao, *A colorimetric method for the determination of xanthine based on the aggregation of gold nanoparticles*. *Microchimica Acta*, 2015. **182**(1): p. 395-400.
